# Supplementary material for: Unlocking the genomic potential of historical and formalin-fixed specimens: phylogenetic insights from museum-preserved threadfin fishes (Teleostei: Polynemidae)
Source: PeerJ journal article supplement (doi:10.7717/peerj.20029), 2025-09-30

# Polydactylus\_bifurcus\_raw\_AR\_Polydactylus\_bifurcus\_aln\_q20\_md

## Single-end read length distribution

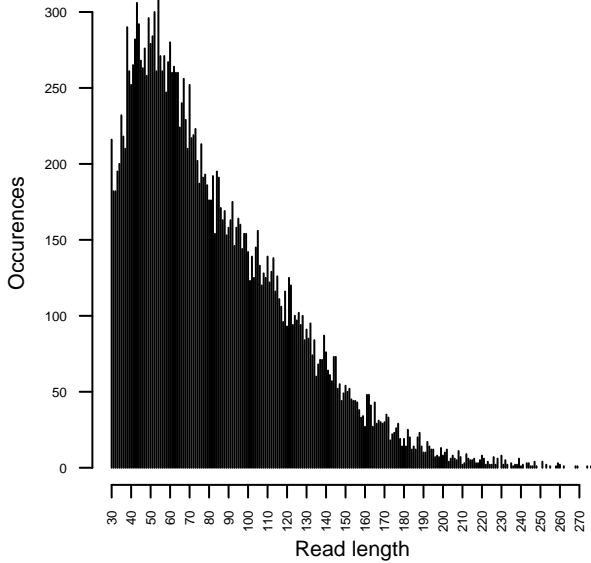

## Single-end read length per strand

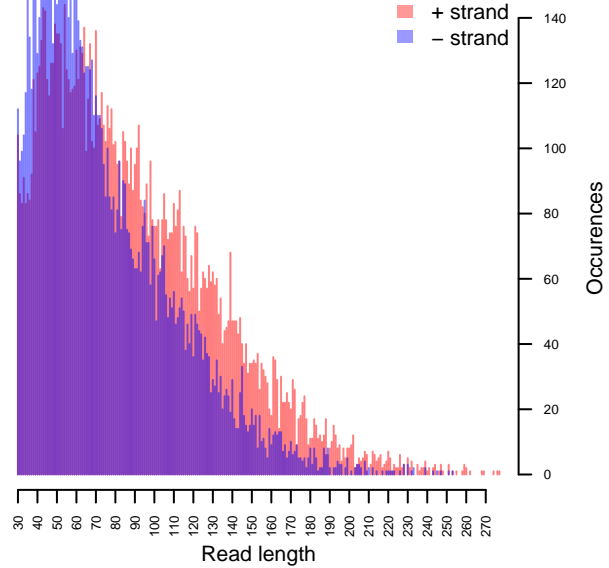

## C>T

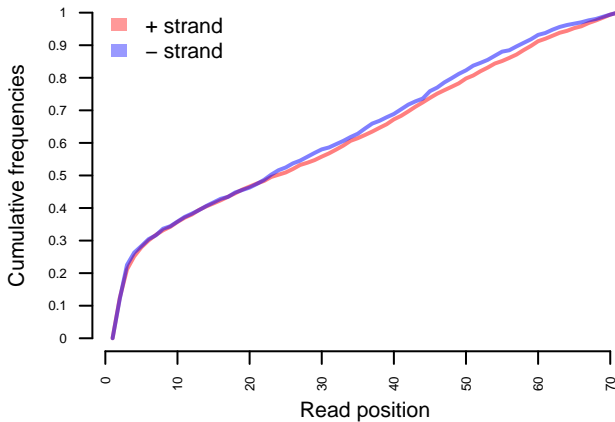

## G>A

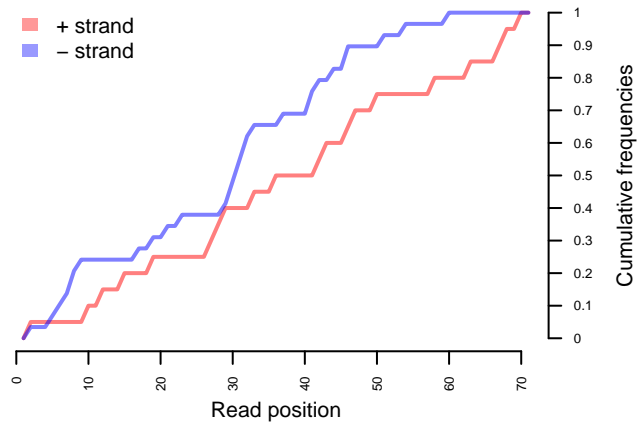

Supplement: S6_mapdamage2.zip [file S6_mapdamage2.zip]
