# Supplementary material for: Unlocking the genomic potential of historical and formalin-fixed specimens: phylogenetic insights from museum-preserved threadfin fishes (Teleostei: Polynemidae)
Source: PeerJ. 2025 Sep 30;13:e20029. doi: 10.7717/peerj.20029 (PMC13353053; doi:10.7717/peerj.20029)
Supplement: Supplemental Information 1 [file peerj-13-20029-s001.xlsx]

## Sheet: GenBank_table
Family	Species	Museum Voucher for UCE Dataset	Genetic Sample for UCE Dataset	SRA Accession Numbers for UCE Loci	Museum Voucher for Mitochondrial Dataset	Genetic Sample for Mitochondrial Dataset	Age of Genetic Sample for Mitochondrial Dataset	SRA Accession Numbers for Mitochondrial Loci	Mitogenome Accession Numbers	COI Accession Numbers
Centrarchidae	Lepomis cyanellus	JFBM Uncat.	See voucher	SRR11016327	Not listed	-	Modern	-	MT667253	See mitogenome
Latidae	Lates calcarifer	AMNH 233713	See voucher	SRR11016328	Not listed	-	Modern	-	NC_007439	See mitogenome
Leptobramidae	Leptobrama muelleri	H. Larson Pers. Col.	See voucher	SRR11016326	Extracted from UCE SRA	Extracted from UCE SRA	Modern	See UCE SRA	PV590343	See mitogenome
Melanotaeniidae	Rheocles wrightae	AMNH Uncat.	See voucher	SRR17616027	Extracted from UCE SRA	Extracted from UCE SRA	Modern	See UCE SRA	PV590344	See mitogenome
Mugilidae	Mugil curema	AMNH Uncat.	See voucher	SRR11016345	USNM 402334	See voucher	Modern	SRR33326241	PV590081	See mitogenome
Pleuronectidae	Lyopsetta exilis	KUI 23754	KUIT 9346	SRR17616023	UW 47642	See voucher	Modern	SRR21843995	OR482561	See mitogenome
Psettodidae	Psettodes erumei	LSUMZ 16779	LSUMZ F5295	SRR5237312	Not listed	-	Modern	-	NC_020032	See mitogenome
Sciaenidae	Micropogonias undulatus	YPM ICH 023546	YFTC 021711	SRR4432445	USNM 454765	See voucher	Modern	-	NC_082746	See mitogenome
Sciaenidae	Pareques acuminatus	CAS PAC20	See voucher	SRR4432394	USNM 416507	See voucher	Modern	SRR21844184	OP056935	See mitogenome
Scombridae	Scomber scombrus	AMNH Uncat.	See voucher	SRR11016337	Not listed	-	Modern	-	NC_006398	See mitogenome
Scophthalmidae	Scophthalmus aquosus	KUI 27107	KUIT 1253	SRR11016335	USNM 433053	See voucher	Modern	SRR21844128	OP056991	See mitogenome
Sphyraenidae	Sphyraena barracuda	UW 158204	UW ROA18221	SRR17616025	Not listed	-	Modern	-	NC_022484	See mitogenome
Polynemidae	Eleutheronema tetradactylum	-	-	-	Not listed	-	Modern	-	NC_021620	See mitogenome
Polynemidae	Eleutheronema rhadinum	KUI 41529	KUIT 10585	SRR17616038	Not listed	-	Modern	-	MW630081	See mitogenome
Polynemidae	Filimanus perplexa	CSIRO BW-A5778	See voucher	SRR17616037	CSIRO Uncat.	CSIRO BW-A5777	Modern	SRR33326248	PV590073	See mitogenome
Polynemidae	Filimanus sealei	USNM 408795	See voucher	SRR17616026	Extracted from UCE SRA	Extracted from UCE SRA	Modern	Extracted from UCE SRA	PV590074	See mitogenome
Polynemidae	Filimanus similis	-	-	-	Not listed	-	Modern	-	-	MF281368
Polynemidae	Filimanus xanthonema	-	-	-	CSIRO H 8376-02	CSIRO BW-A9040	Modern	SRR25465199	PV590075	See mitogenome
Polynemidae	Filistriatus bifurcus gen. nov.	-	-	-	USNM 76627*	See voucher	Historic	SRR33326243	PV590084	See mitogenome
Polynemidae	Filistriatus plebeius gen. nov.	USNM 439841	See voucher	SRR17616033	Extracted from UCE SRA	Extracted from UCE SRA	Modern	Extracted from UCE SRA	PV590090	See mitogenome
Polynemidae	Filistriatus sexfilis gen. nov.	SAIAB 77939	KUIT 6829	SRR5237313	Extracted from UCE SRA	Extracted from UCE SRA	Modern	Extracted from UCE SRA	PV590092	See mitogenome
Polynemidae	Galeoides decadactylus	-	-	-	MNHN ICTI 876	See voucher	Modern	SRR33326247	PV590077	See mitogenome
Polynemidae	Leptomelanosoma indicum	USNM 444119	See voucher	SRR17616024	Extracted from UCE SRA	Extracted from UCE SRA	Modern	Extracted from UCE SRA	PV590078	See mitogenome
Polynemidae	Leptomelanosoma macrophthalmus	-	-	-	ZRC 39003**	See voucher	Historic	SRR33326242	PV593525	See mitogenome
Polynemidae	Parapolynemus verekeri	MAGNT S.17530-002	MAGNT A01566	SRR17616022	MAGNT S.17530-002	MAGNT A01566	Modern	SRR33326240	PV590080	See mitogenome
Polynemidae	Pentanemus quinquarius	-	-	-	MNHN 2002-0162	See voucher	Modern	SRR33326239	PV590082	See mitogenome
Polynemidae	Polydactylus approximans	SIO 98-176	See voucher	SRR17616021	SIO 98-176	See voucher	Modern	SRR33326238	PV590083	See mitogenome
Polynemidae	“Polydactylus” longipes	-	-	-	MNHN 2008-1644	See voucher	Modern	-	-	PV590860
Polynemidae	“Polydactylus” macrochir	-	-	-	MAGNT S.17512-001	MAGNT A01461	Modern	SRR33326237	PV590079	See mitogenome
Polynemidae	“Polydactylus” malagasyensis	SIO 04-68	See voucher	SRR17616020	SIO 04-68	See voucher	Modern	Extracted from UCE SRA	PV590085	See mitogenome
Polynemidae	“Polydactylus” microstomus	USNM 408834	See voucher	SRR17616019	USNM 408834	See voucher	Modern	Extracted from UCE SRA	PV590086	See mitogenome
Polynemidae	“Polydactylus” mullani	-	-	-	Not listed	-	Modern	-	-	MF281374
Polynemidae	“Polydactylus” multiradiatus	MAGNT S.17508-007	MAGNT A01579	SRR17616018	MAGNT S.17508-007	MAGNT A01579	Modern	SRR33326236	PV590087	See mitogenome
Polynemidae	“Polydactylus” nigripinnis	MAGNT S.17552-001	MAGNT A02593	SRR17616036	CSIRO H 8846-04	CSIRO GT 15206	Modern	SRR25465232	PV590088	See mitogenome
Polynemidae	Polydactylus octonemus	KUI 30108	KUIT 5105	SRR17616035	KUI 30108	KUIT 5105	Modern	SRR33326235	PV590089	See mitogenome
Polynemidae	Polydactylus oligodon	-	-	-	LBP 40523	See voucher	Modern	-	-	JQ365495
Polynemidae	Polydactylus opercularis	FMNH 143546	See voucher	SRR17616034	FMNH 143546	See voucher	Modern	SRR33326234	PV590076	See mitogenome
Polynemidae	“Polydactylus” quadrifilis	OS 20961	OS GAB17-966	SRR17616032	OS 20526	OS GAB 17-986	Modern	SRR33326246	PV590091	See mitogenome
Polynemidae	“Polydactylus” sextarius	KUI 41535	KUIT 10667	SRR17616031	Extracted from UCE SRA	Extracted from UCE SRA	Modern	Extracted from UCE SRA	PV590093	See mitogenome
Polynemidae	Polydactylus virginicus	USNM 349227	KUIT 9031	SRR11016339	USNM 420265	See voucher	Modern	SRR21844042	OP056931	See mitogenome
Polynemidae	Polynemus aquilonaris	ANSP 177984 (tag 1064)	ANSP t5607	SRR17616030	Extracted from UCE SRA	Extracted from UCE SRA	Modern	Extracted from UCE SRA	PV590094	See mitogenome
Polynemidae	Polynemus melanochir	SIO 12-55	See voucher	SRR17616029	SIO 12-55	See voucher	Modern	SRR33326245	PV590095	See mitogenome
Polynemidae	Polynemus multifilis	ANSP 177983 (tag 1099)	ANSP t5605	SRR17616028	ANSP 177983 (tag 1099)	ANSP t5605	Modern	SRR33326244	PV590096	See mitogenome
Polynemidae	Polynemus paradiseus	-	-	-	Not listed	-	Modern	-	NC_026236	See mitogenome
